# Supplementary material
Source: Springer Nature journal article supplement (https://www.springermedizin.de/resource/supplementary/12885_2013_4491_MOESM2_ESM.pdf/9466496)

Brain metastasis-free survival (%)

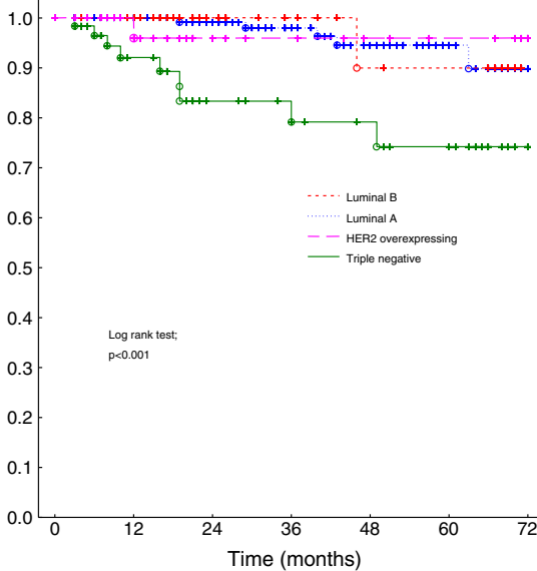

Supplement: MOESM2 [file 9466496]
